1 **Chemical biofilm dislodgement with chelating and reducing agents in comparison to sonication:**  
2 **implications for the diagnosis of implant associated infection**

3 Svetlana Karbysheva<sup>1,2\*</sup>, Maria Eugenia Butini<sup>1,2</sup>, Mariagrazia Di Luca<sup>1,2</sup>, Tobias Winkler<sup>1,2</sup>, Michael  
4 Schütz,<sup>3</sup> Andrej Trampuz<sup>1,2</sup>

5 <sup>1</sup> Charité – Universitätsmedizin Berlin, corporate member of Freie Universität Berlin, Humboldt-Universität  
6 zu Berlin and Berlin Institute of Health, Berlin, Germany, Center for Musculoskeletal Surgery,

7 <sup>2</sup> Berlin-Brandenburg Centre for Regenerative Therapies (BCRT), Berlin, Germany

8 <sup>3</sup> Jamieson Trauma Institute, Queensland University of Technology, Department of Orthopaedics and  
9 Trauma, Brisbane, Australia

10 **Running title:** Chemical biofilm dislodgement for diagnosis of implant infection

11 **Key words:** biofilm, chemical dislodgement, sonication, prosthesis

12 **\*Corresponding author:**

13 Andrej Trampuz, MD

14 Charité – Universitätsmedizin Berlin

15 Center for Musculoskeletal Surgery

16 Mittelallee 4, D-13353 Berlin, Germany

17 Phone: +49 30 450 615 073

18 Fax: +49 30 450 552 987

19 email: [andrej.trampuz@charite.de](mailto:andrej.trampuz@charite.de)

20 **Abstract**

21 Sonication of removed devices improved the microbiological diagnosis of infection. Recently, chemical  
22 agents have been investigated for dislodgement of biofilms, including the chelating agent  
23 ethylenediaminetetraacetic acid (EDTA) and the reducing agent dithiothreitol (DTT). We compared the  
24 efficacy of chemical methods (EDTA and DTT) to sonication for biofilm dislodgement. *Staphylococcus*  
25 *epidermidis* (ATCC 35984) and *Pseudomonas aeruginosa* (ATCC 53278) biofilms were grown on porous  
26 glass beads for 3 days. After biofilm formation, beads were exposed to 0.9% saline, sonication and/or  
27 chemical agents. Quantitative and qualitative biofilm analyses were performed by colony counting  
28 (CFU/ml), isothermal microcalorimetry and scanning electron microscopy. The colony counts after  
29 treatment with EDTA and DTT were similar to those after exposure to 0.9% saline (6.3, 6.1 and 6.0 log  
30 CFU/ml, respectively) for *S. epidermidis* biofilms, and (5.1, 5.2 and 5.0 log CFU/ml, respectively) for *P.*  
31 *aeruginosa* biofilm. Sonication detected higher CFU counts (7.5 log CFU/ml) for *S. epidermidis*; ( $p < 0.05$ )  
32 and 6.5 log for *P. aeruginosa* biofilm ( $p < 0.05$ ). Concordant results were detected with isothermal  
33 microcalorimetry and scanning electron microscopy. In conclusion, the CFU count after treatment of *S.*  
34 *epidermidis* or *P. aeruginosa* biofilms with EDTA and DTT was similar to those observed after 0.9% saline  
35 used as control. In contrast, sonication was superior to chemical methods for biofilm dislodgment and  
36 detection of microorganisms in sonication fluid. In conclusion, our study showed that sonication is  
37 superior to chemical method to dislodge bacterial biofilm from artificial surface and should be considered  
38 as standard diagnostic method for biofilm detection in implant-associated infections.

## 39 INTRODUCTION

40 Orthopedic devices are increasingly used for treatment of degenerative joint disease and for fixation of  
41 bone fractures. Infections represent a significant complication of implant surgery, resulting in major  
42 challenges in diagnosis and treatment. The crucial step in the management of orthopedic implant-  
43 associated infections is the accurate and timely diagnosis (1). However, this represents a considerable  
44 challenge, as these infections are caused by microorganisms embedded in a polymeric matrix attached to  
45 the device surface. In order to isolate and identify the causing microorganism, the dislodgment and  
46 dispersion of the sessile community represent the first step before plating the specimen on solid media  
47 (2). To improve biofilm removal from implant surface, different approaches had been described. Among  
48 others, sonication is based on a mechanical dislodgement (3), while treatments with the metal-chelating  
49 agent ethylenediaminetetraacetic acid (EDTA) (4) and the strong reducing agent, dithiothreitol (DTT) (5),  
50 might disgregate biofilm by chemical interactions.

51 Sonication of explanted components as an add-on procedure to routinely conducted microbiological  
52 analysis has shown to improve the pathogen detection (3), (6). Sonication reportedly yields rates of  
53 bacterial recovery from 70% to 100% compared to 10% to 100% when scraping the prosthetic surface  
54 and sensitivity of approximately 65% to 80% depending on prior antibiotic therapy (7), (8).

55 Recent reports considered the treatment of explanted prostheses with a solution containing DTT a  
56 potential alternative to sonication to dislodge biofilm-embedded bacteria and allow for subsequent  
57 isolation and identification of the microorganisms by conventional laboratory techniques (5). The ability of  
58 EDTA to chelate and potentiate the cell walls of bacteria and destabilize biofilms by sequestering calcium,  
59 magnesium, zinc, and iron suggests its use suitable for the biofilm detachment (4).

60 The aim of the study was to compare the ability of chemical (EDTA and DTT) and mechanical (sonication)  
61 methods alone or in combination to detach biofilm-embedded bacteria.

## 62 MATERIALS AND METHODS

63 **Bacterial strains and biofilm growth conditions.** Biofilms of *Staphylococcus epidermidis* (ATCC  
64 35984) and *Pseudomonas aeruginosa* (ATCC 53278) were formed on porous glass beads (4 mm  
65 diameter, 60 µm pore sizes, ROBU<sup>®</sup>, Hattert, Germany). To form biofilms, beads were placed in 2 ml of  
66 brain heart infusion broth (BH1b, Sigma-Aldrich, St. Louis, MO, USA) containing  $1 \times 10^8$  CFU/ml bacterial  
67 inoculum and incubated at 37°C. After 24 h, beads were re-incubated in fresh BH1b and biofilms were let

68 statically to grow for further 72 h at 37°C. After biofilm formation, beads were washed six times with 2 ml  
69 0.9% saline to remove planktonic bacteria.

70 **Biofilm dislodgment by chemical methods (EDTA or DTT) or sonication.** To define the minimal  
71 concentration and treatment duration for biofilm dislodgment, washed beads were placed in 1 ml of EDTA  
72 at concentrations 12, 25 and 50 mM or DTT at concentrations 0.5, 1 and 5 g/l and exposed for 5, 15 and  
73 30 min. Untreated beads incubated with 0.9% saline were used as negative control.

74 To evaluate the sonication effect, biofilms were sonicated as described previously (3). Briefly, each bead  
75 was inoculated in 1 ml 0.9% saline and sonicated at 40 kHz at intensity 0.1 Watt/cm<sup>2</sup> (BactoSonic,  
76 BANDELIN electronic, Berlin, Germany) for 1 minute. One-hundred microliter of serial dilutions of the  
77 resulting sonication fluid or the solution obtained after chemical treatment with DTT or EDTA were plated  
78 onto Tryptic Soy Agar (TSA) (Sigma-Aldrich, St. Louis, MO, USA). After 24 h of incubation at 37°C, the  
79 CFU/ml number was counted.

80 Additionally, the viability of planktonic bacteria in presence of chemical agents was evaluated. Planktonic  
81 cells of *P. aeruginosa* and *S. epidermidis* at final concentration of  $\approx 10^5$  CFU/ml were exposed to EDTA  
82 (25 mM) and DTT (1 g/l) for different time periods (5, 15 and 30 min). All experiments were performed in  
83 triplicates.

84 **Isothermal microcalorimetry analysis.** To prove the dislodgment effect of previously described  
85 methods and reveal the presence of bacterial cells remained attached on the bead surface, treated beads  
86 were washed six times in 2 ml 0.9% saline to remove the dislodged biofilm and placed in 4 ml-glass  
87 ampoules containing 3 ml of BHlb. The ampoules were air-tightly sealed and introduced into the  
88 microcalorimeter (TAM III, TA Instruments, Newcastle, DE, USA), first in the equilibration position for 15  
89 min to reach 37°C and avoid heat disturbance in the measuring position. Heat flow ( $\mu$ W) was recorded up  
90 to 20 h. The calorimetric time to detection (TTD) was defined as the time from insertion of the ampoule  
91 into the calorimeter until the exponentially rising heat flow signal exceeded 100  $\mu$ W to distinguish  
92 microbial heat production from the thermal background (9). Growth media without molds served as  
93 negative control.

94 **Scanning electron microscopy.** Beads with biofilm were fixed with 2.5% (v/v) glutaraldehyde in  
95 sodium cacodylate buffer and the samples were dehydrated with increasing concentrations of ethanol  
96 for 2 min each. The samples were stored in vacuum until use. Prior to analysis by Field emission  
97 scanning electron microscope (DSM 982 GEMINI, Zeiss Oberkochen, Germany), the samples were  
98 subjected to gold sputtering (MED 020, BAL-TEC). All experiments were performed in triplicate.

99 **Statistic methods.** Statistical analyses were performed using SigmaPlot (version 13.0; Systat Software,  
100 Chicago, IL, USA) and graphics using Prism (version 7.03; GraphPad, La Jolla, CA, USA). Quantitative  
101 data were presented as mean  $\pm$  standard deviation (SD) or median and range, as appropriate. To  
102 compare different groups, nonparametric Kruskal-Wallis test and Wilcoxon signed-rank test for  
103 independent samples were used. The significance level in hypothesis testing was predetermined at p  
104  $<0.05$ .

## 105 **RESULTS**

106 **CFU counting method.** The dislodged CFU counts after treatment of beads with *S. epidermidis* and *P.*  
107 *aeruginosa* biofilms at different concentrations and time points are shown in Figure 1 and 2. Evaluating  
108 dislodgement effect of chemical methods, mean colony count obtained after treatment of *S. epidermidis*  
109 biofilms with EDTA (25 mM, 15 min) and DTT (1 g/L, 15 min) was similar to those observed after 0.9%  
110 NaCl used as control (6.3, 6.1 and 6.0 log CFU/mL, respectively). By contrast, sonication detected  
111 significantly higher CFU counts with 7.5 log ( $p <0.05$ ) (Figure 3 A). Similar results were observed when *P.*  
112 *aeruginosa* biofilms were treated with chemicals (EDTA and DTT) or saline (5.1, 5.2 and 5.0 log CFU/ml,  
113 respectively). By using sonication, CFU count of 6.5 log ( $p <0.05$ ) was observed. (Figure 3 B).

114 **Isothermal microcalorimetry.** The heat produced by samples containing sonicated beads of *S.*  
115 *epidermidis* was detected after 11 h from monitoring start (100  $\mu$ W was set as cut-off value). In contrast,  
116 heat production exceeding the threshold of 100  $\mu$ W was observed earlier (after 6.3 and 6.5 h) for the  
117 samples that were previously treated with EDTA and DTT, confirming the presence of a higher number of  
118 residual bacteria on beads treated with chemical methods, in comparison to those after sonication. This  
119 difference was statistically significant ( $p <0.001$ ). No difference in heat production was observed after  
120 treatment with 0.9% saline (control) and EDTA or DTT (6.3 vs 6.5 and 6.4 h, respectively) ( $p=0.3$ ). Similar  
121 results were observed with the analysis of *P. aeruginosa* biofilm beads, although the time of heat  
122 detection after sonication of beads was significantly higher (11 h) in comparison to EDTA and DTT (6.5  
123 and 6.5 h, respectively) ( $p <0.001$ ); no difference between both chemical methods and the control (6.2 h)  
124 was observed ( $p=0.3$ ) (Figure 4 A and B).

125 **Scanning electron microscopy.** The use of scanning electron microscopy (SEM) allowed to visualize  
126 the biofilms of *S. epidermidis* and *P. aeruginosa* before and after treatments with either chemicals or  
127 sonication. For both microorganisms the scanning electron microscope images showed substantial less  
128 biofilm biomass remaining on the beads when sonication was applied compared to control as well as both  
129 chemical methods (Figure 5 and 6).

## 130 DISCUSSION

131 Implant-associated infections due to biofilm formation represent a major challenge for the microbiological  
132 diagnosis (10), (11). The presence of bacteria aggregated in a biofilm makes the detection of  
133 microorganisms challenging when the sample is seeded on standard medium, without any previous  
134 dislodgment and dispersion of the sessile community (2). We investigated the ability of different methods  
135 to dislodge *S. epidermidis* and *P. aeruginosa* biofilms from an abiotic surface *in vitro*, including sonication  
136 and chemical treatment with EDTA or DTT. To compare dislodgement effect of chemical methods, the  
137 concentrations of 25 mM EDTA and 1 g/l DTT were chosen as they showed significant increase in CFU  
138 count compared to other concentrations at the time point of 15 min. Concentration of 1 g/l DTT was also  
139 proposed by Drago et al. (5) The time of 15 min was chosen as a most appropriate time for the routine  
140 microbiological examination. (Fig. 1, Fig. 2).

141 Our results showed significantly higher dislodged CFU/ml for *S. epidermidis* *P. aeruginosa* biofilm when  
142 sonication method was applied in comparison to chemical agent DTT. No significant difference in the  
143 CFU number was observed after 1 mg/l DTT treatment, as compared to the control. Our results contradict  
144 those showed by other authors (5). In this study polyethylene and titanium discs covered with *P.*  
145 *aeruginosa*, *S. aureus*, *S. epidermidis* and *E. coli* biofilms were treated with DTT solutions at different  
146 concentrations and for different time points. The authors found that a solution of 1g/l DTT applied for 15  
147 min was able to dislodge *P. aeruginosa* biofilm with similar yield as obtained by sonication, but the  
148 number of *S. aureus* biofilm cells removed by DTT were higher than that dislodged after sonication from  
149 the same materials. Similarly, colony numbers for *S epidermidis* were higher after DTT treatment than  
150 after sonication, whereas the number of *E. coli* colonies obtained after sonication and DTT were similar.  
151 The discordance in the study results might be explained by the influence of biomaterial type on the biofilm  
152 formation. In a recent study (12), the influence of biomaterials of retrieved hip and knee prosthesis on  
153 microbial detection by sonication was onstrateddem.

154 In our study EDTA was not able to efficiently dislodge bacterial biofilm from artificial surface. Cell colony  
155 count was similar to those obtained after treatment with 0.9% saline and significantly lower than those  
156 observed when sonication was applied. Previous reports demonstrated that EDTA affects *P. aeruginosa*  
157 biofilms (4), (13). Banin et al. suggested that exposure of *P. aeruginosa* biofilms to EDTA triggered  
158 detachment of cells from biofilms. They showed the dispersal of cells from biofilms caused by EDTA in a  
159 flow cell system. After addition of 50 mM EDTA to the medium reservoir, in 50 min they determined  
160 increase two log more in the number of cells in the effluent compared to untreated flow cell which showed

161 a constant level of viable, dispersed cells in the effluent. They note that activity of EDTA in detachment of  
162 cells from the biofilm is mediated by chelation of several divalent cations such as magnesium, calcium,  
163 and iron that are required to stabilize the biofilm matrix.

164 Our results from counting the dislodged bacterial counts were confirmed by two additional independent  
165 techniques, namely isothermal microcalorimetry and SEM imaging. Isothermal microcalorimetry is a  
166 highly sensitive method for bacterial replication due to their metabolic heat production (14), (9). It has  
167 been widely employed in different studies to test the viability of either planktonic or biofilm bacteria after  
168 antibiotic treatment (15), (16). Here it was used to evaluate bacteria remaining on the glass beads after  
169 dislodging treatments. Isothermal microcalorimetry showed a significant delay in the detection of bacterial  
170 metabolism-related heat production from the beads with *S. epidermidis* when sonication was applied, as  
171 compared to chemical treatments - EDTA and DTT, suggesting that significantly less bacteria remained  
172 attached to the beads after sonication. Similar results were observed by the analysis of *P. aeruginosa*  
173 biofilm beads. The use of SEM allowed for visualization the biofilms of *S. epidermidis* and *P. aeruginosa*  
174 before and after treatments with either chemicals or sonication. In both types of bacterial biofilm SEM  
175 images showed less biofilm remaining on the beads when sonication was applied compared to the  
176 untreated control as well as both chemical methods.

177 In conclusion, our study showed that sonication is superior to chemical method for dislodgement of  
178 bacterial biofilm from surface and should be considered as the standard diagnostic method for biofilm  
179 detection in the diagnosis of implant-associated infection. Future studies may investigate a potential  
180 synergistic effect of sonication with chemical or mechanical dislodgement techniques, which do not affect  
181 the viability of microorganisms.

## 182 **ACKNOWLEDGMENTS**

183 This work was supported by the PRO-IMPLANT Foundation, Berlin, Germany (<https://www.pro-implant->  
184 [foundation](https://www.pro-implant-foundation)), a non-profit organization supporting research, education, global networking and care of  
185 patients with bone, joint or implant-associated infection. The funding had no influence on the data  
186 analysis or interpretation of the results.

187 **REFERENCES**

- 188 1. Trampuz A, Hanssen AD, Osmon DR, Mandrekar J, Steckelberg JM, Patel R. 2004. Synovial fluid  
189 leukocyte count and differential for the diagnosis of prosthetic knee infection. *Am J Med*  
190 117:556-62.
- 191 2. Clauss M, Trampuz A, Borens O, Bohner M, Ilchmann T. 2010. Biofilm formation on bone grafts  
192 and bone graft substitutes: comparison of different materials by a standard in vitro test and  
193 microcalorimetry. *Acta Biomater* 6:3791-7.
- 194 3. Trampuz A, Piper KE, Jacobson MJ, Hanssen AD, Unni KK, Osmon DR, Mandrekar JN, Cockerill FR,  
195 Steckelberg JM, Greenleaf JF, Patel R. 2007. Sonication of removed hip and knee prostheses for  
196 diagnosis of infection. *N Engl J Med* 357:654-63.
- 197 4. Banin E, Brady KM, Greenberg EP. 2006. Chelator-induced dispersal and killing of *Pseudomonas*  
198 *aeruginosa* cells in a biofilm. *Appl Environ Microbiol* 72:2064-9.
- 199 5. Drago L, Romano CL, Mattina R, Signori V, De Vecchi E. 2012. Does dithiothreitol improve  
200 bacterial detection from infected prostheses? A pilot study. *Clin Orthop Relat Res* 470:2915-25.
- 201 6. Holinka J, Bauer L, Hirschl AM, Graninger W, Windhager R, Presterl E. 2011. Sonication cultures  
202 of explanted components as an add-on test to routinely conducted microbiological diagnostics  
203 improve pathogen detection. *J Orthop Res* 29:617-22.
- 204 7. Berbari EF, Marculescu C, Sia I, Lahr BD, Hanssen AD, Steckelberg JM, Gullerud R, Osmon DR.  
205 2007. Culture-negative prosthetic joint infection. *Clin Infect Dis* 45:1113-9.
- 206 8. Trampuz A, Piper KE, Hanssen AD, Osmon DR, Cockerill FR, Steckelberg JM, Patel R. 2006.  
207 Sonication of explanted prosthetic components in bags for diagnosis of prosthetic joint infection  
208 is associated with risk of contamination. *J Clin Microbiol* 44:628-31.
- 209 9. Butini ME, Gonzalez Moreno M, Czuban M, Koliszak A, Tkhilaishvili T, Trampuz A, Di Luca M.  
210 2018. Real-Time Antimicrobial Susceptibility Assay of Planktonic and Biofilm Bacteria by  
211 Isothermal Microcalorimetry. *Adv Exp Med Biol* doi:10.1007/5584\_2018\_291.
- 212 10. López D, Vlamakis H, Kolter R. 2010. Biofilms. *Cold Spring Harb Perspect Biol* 2:a000398.



- 213 11. Hall-Stoodley L, Costerton JW, Stoodley P. 2004. Bacterial biofilms: from the natural  
214 environment to infectious diseases. *Nat Rev Microbiol* 2:95-108.
- 215 12. Karbysheva S, Grigoricheva L, Golnik V, Popov S, Renz N, Trampuz A. 2019. Influence of retrieved  
216 hip- and knee-prosthesis biomaterials on microbial detection by sonication. *Eur Cell Mater*  
217 37:16-22.
- 218 13. Chen X, Stewart PS. 2000. Biofilm removal caused by chemical treatments. *Water Research*  
219 34:4229-4233.
- 220 14. Solokhina A, Bonkat G, Kulchavenya E, Braissant O. 2018. Drug susceptibility testing of mature  
221 *Mycobacterium tuberculosis* H37Ra and *Mycobacterium smegmatis* biofilms with calorimetry  
222 and laser spectroscopy. *Tuberculosis (Edinb)* 113:91-98.
- 223 15. Gonzalez Moreno M, Trampuz A, Di Luca M. 2017. Synergistic antibiotic activity against  
224 planktonic and biofilm-embedded *Streptococcus agalactiae*, *Streptococcus pyogenes* and  
225 *Streptococcus oralis*. *J Antimicrob Chemother* 72:3085-3092.
- 226 16. Di Luca M, Navari E, Esin S, Menichini M, Barnini S, Trampuz A, Casani A, Batoni G. 2018.  
227 Detection of Biofilms in Biopsies from Chronic Rhinosinusitis Patients: In Vitro Biofilm Forming  
228 Ability and Antimicrobial Susceptibility Testing in Biofilm Mode of Growth of Isolated Bacteria.  
229 *Adv Exp Med Biol* 1057:1-27.

Fig. 1. *S. epidermidis* biofilm after treatment with different concentrations of either EDTA (A) or DTT (B) at different time points. Mean values are shown, error bars represent standard deviation.

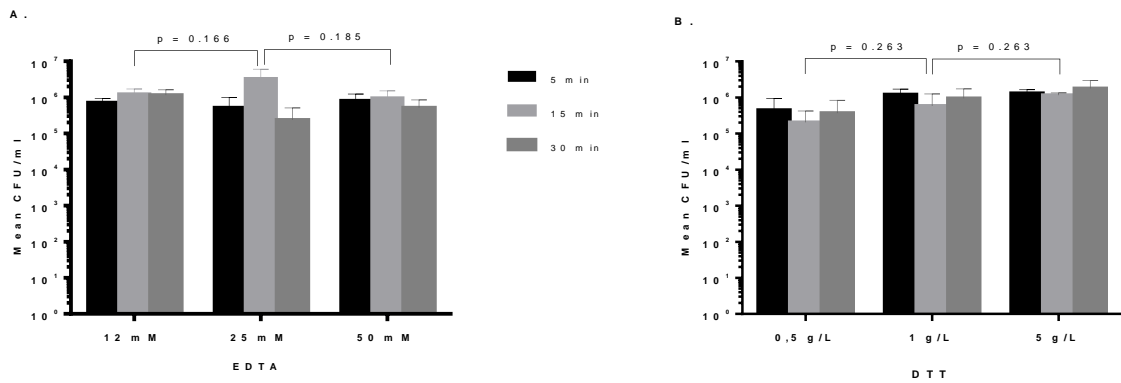

Fig. 2. *P. aeruginosa* biofilm after treatment with different concentrations of either EDTA (A) or DTT (B) at different time points. Mean values are shown, error bars represent standard deviation.

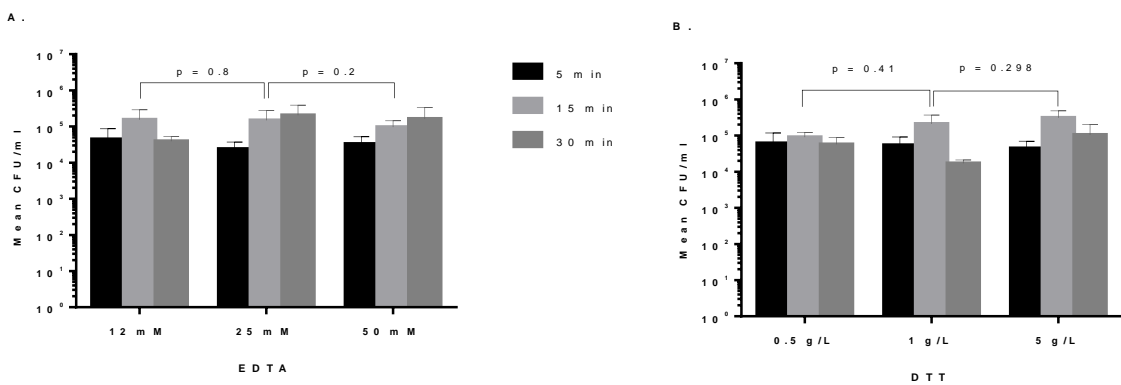

Fig. 3. Quantitative analysis of biofilm dislodging methods. (A) *S. epidermidis* biofilm. (B) *P. aeruginosa* biofilm.

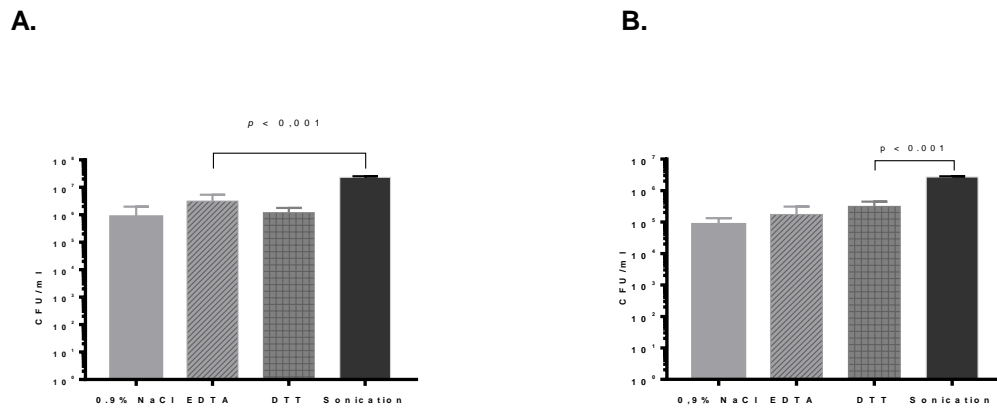

Fig. 4. The microcalorimetric time to detection (TTD) a bacterial growth. A. *S. epidermidis* biofilm. B. *P. aeruginosa* biofilm.

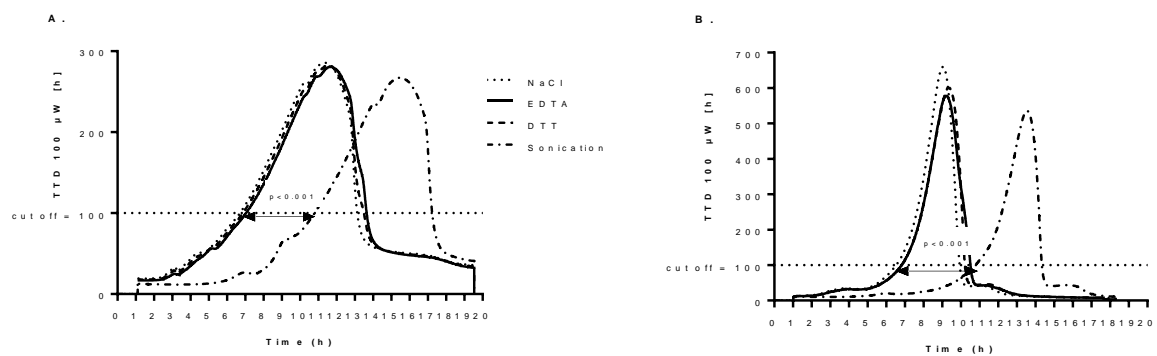

Fig. 5. Scanning electron microscopy (SEM) of *S. epidermidis* biofilm: (A) beads after 0.9% saline treatment (control); (B) beads after EDTA treatment; (C) beads after DTT treatment; (D) beads after sonication treatment.

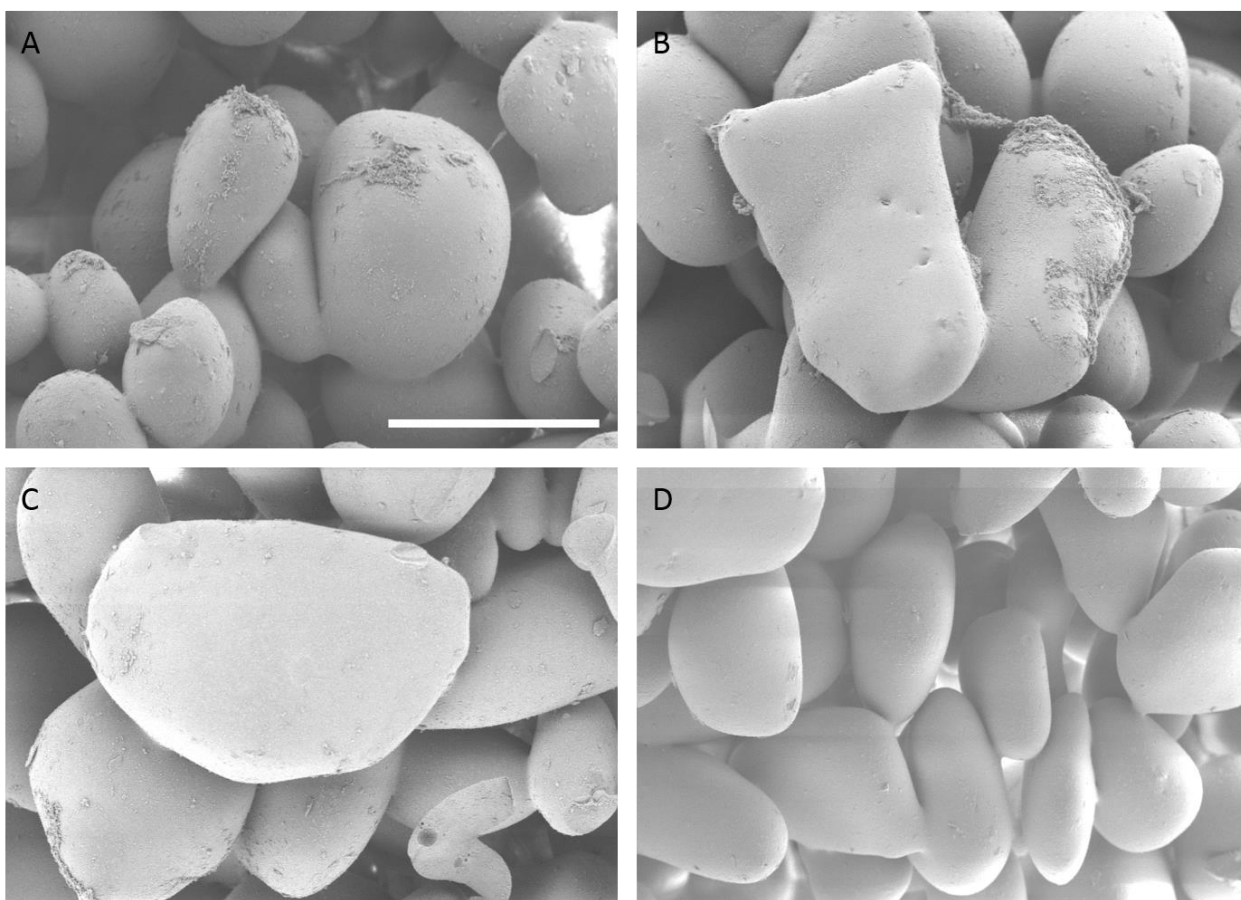

Fig. 6. Scanning electron microscopy (SEM) of *P. aeruginosa* biofilm: (A) beads after 0.9% saline treatment (control); (B) beads after EDTA treatment; (C) beads after DTT treatment; (D) beads after sonication treatment.

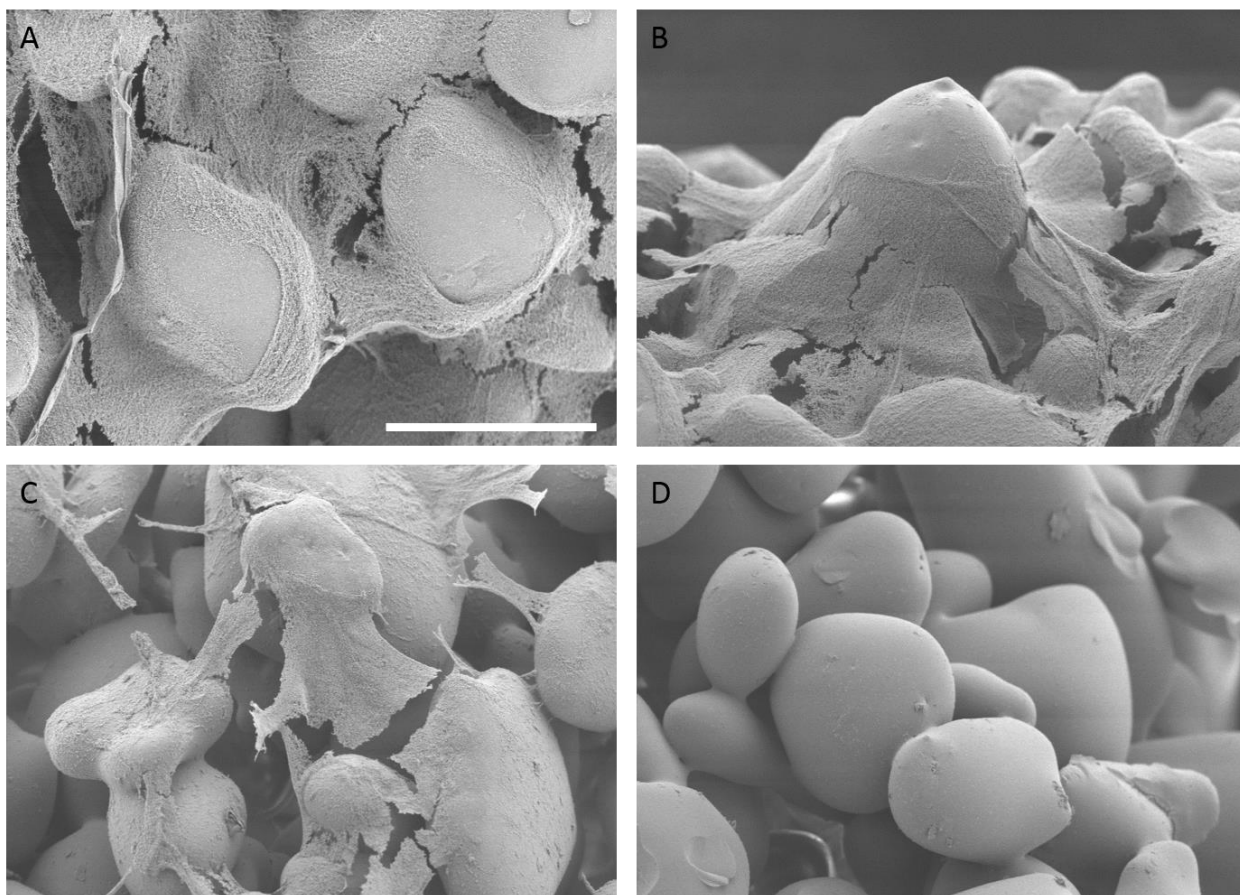

Source: https://www.biorxiv.org/content/10.1101/604637v1.full.pdf
